# Supplementary material for: Chromosome-level genome assembly and annotation of the loquat (Eriobotrya japonica) genome
Source: PubMed Central journal article supplement (PMC7059265; doi:10.1093/gigascience/giaa015), 2020-03-06
Supplement: giaa015_giga-d-19-00365_original_submission.pdf [file giaa015_giga-d-19-00365_original_submission.pdf]

# GigaScience

## The chromosome-level genome assembly and annotation of the loquat (*Eriobotrya japonica*) genome --Manuscript Draft--

|                                                      |                                                                                                                                                                                                                                                                                                                                                                                                                                                                                                                                                                                                                                                                                                                                                                                                                                                                                                                                                                                                                                                                                                                                                                                                                                                                                                                                                                                                                                                                                                                                                                                                                                                                                                                                                                                                                                                                                                                            |                   |
|------------------------------------------------------|----------------------------------------------------------------------------------------------------------------------------------------------------------------------------------------------------------------------------------------------------------------------------------------------------------------------------------------------------------------------------------------------------------------------------------------------------------------------------------------------------------------------------------------------------------------------------------------------------------------------------------------------------------------------------------------------------------------------------------------------------------------------------------------------------------------------------------------------------------------------------------------------------------------------------------------------------------------------------------------------------------------------------------------------------------------------------------------------------------------------------------------------------------------------------------------------------------------------------------------------------------------------------------------------------------------------------------------------------------------------------------------------------------------------------------------------------------------------------------------------------------------------------------------------------------------------------------------------------------------------------------------------------------------------------------------------------------------------------------------------------------------------------------------------------------------------------------------------------------------------------------------------------------------------------|-------------------|
| <b>Manuscript Number:</b>                            | GIGA-D-19-00365                                                                                                                                                                                                                                                                                                                                                                                                                                                                                                                                                                                                                                                                                                                                                                                                                                                                                                                                                                                                                                                                                                                                                                                                                                                                                                                                                                                                                                                                                                                                                                                                                                                                                                                                                                                                                                                                                                            |                   |
| <b>Full Title:</b>                                   | The chromosome-level genome assembly and annotation of the loquat ( <i>Eriobotrya japonica</i> ) genome                                                                                                                                                                                                                                                                                                                                                                                                                                                                                                                                                                                                                                                                                                                                                                                                                                                                                                                                                                                                                                                                                                                                                                                                                                                                                                                                                                                                                                                                                                                                                                                                                                                                                                                                                                                                                    |                   |
| <b>Article Type:</b>                                 | Data Note                                                                                                                                                                                                                                                                                                                                                                                                                                                                                                                                                                                                                                                                                                                                                                                                                                                                                                                                                                                                                                                                                                                                                                                                                                                                                                                                                                                                                                                                                                                                                                                                                                                                                                                                                                                                                                                                                                                  |                   |
| <b>Funding Information:</b>                          | National Natural Science Foundation of China (31701886)                                                                                                                                                                                                                                                                                                                                                                                                                                                                                                                                                                                                                                                                                                                                                                                                                                                                                                                                                                                                                                                                                                                                                                                                                                                                                                                                                                                                                                                                                                                                                                                                                                                                                                                                                                                                                                                                    | Dr. Shuang Jiang  |
|                                                      | a Grant for Agriculture Applied Technology Development Program from Shanghai Agriculture Committee (2015-6-2-2)                                                                                                                                                                                                                                                                                                                                                                                                                                                                                                                                                                                                                                                                                                                                                                                                                                                                                                                                                                                                                                                                                                                                                                                                                                                                                                                                                                                                                                                                                                                                                                                                                                                                                                                                                                                                            | Dr. Xueying Zhang |
| <b>Abstract:</b>                                     | <p>Background</p> <p>The loquat (<i>Eriobotrya japonica</i>) is a species of flowering plant in the family Rosaceae, which is widely cultivated in Asian, European, and African countries. It flowered in the winter and ripen in the early summer. The genome of loquat was still not reported, which limited the study of molecular biology in the loquat. Here we used third-generation sequencing Nanopore and High-through chromosome conformation capture (Hi-C) technology to sequence the genome of the <i>Eriobotrya</i> to provide the reference to the researchers. Findings</p> <p>We generated 100.10 Gb long reads using Nanopore sequencing technologies. Three Illumina high-throughput sequencing data, including Genome short reads (47.42 Gb), transcriptome short reads (11.06 Gb) and Hi-C short reads (67.25 Gb) were also sequenced to construct the loquat genome. All data were assembled into a 760.1 Mb genome assembly. The Hi-C technology assembled contigs into chromosomes based on the contacts between contigs and then assembled a genome with 17 chromosomes and a scaffold N50 length of 39.7 Mb. A total of 45,743 protein-coding genes were annotated in the <i>Eriobotrya</i> genome, and we analyzed phylogenetic relationships between the <i>Eriobotrya</i> and the other six Rosaceae species. The <i>Eriobotrya</i> has a close relationship with <i>Malus</i> and <i>Pyrus</i>, and the divergence time of <i>Eriobotrya</i> and <i>Malus</i> was 6.76 million years ago. Furthermore, the chromosome rearrangement was found in <i>Eriobotrya</i> and <i>Malus</i>. Conclusions: We constructed the first high-quality chromosome-level <i>Eriobotrya</i> genome using Illumina, Nanopore, and Hi-C technologies. This work provides a valuable reference genome for the molecular studies of the loquat, and give a new insight of chromosome evolution in the loquat.</p> |                   |
| <b>Corresponding Author:</b>                         | Xueying Zhang<br><br>CHINA                                                                                                                                                                                                                                                                                                                                                                                                                                                                                                                                                                                                                                                                                                                                                                                                                                                                                                                                                                                                                                                                                                                                                                                                                                                                                                                                                                                                                                                                                                                                                                                                                                                                                                                                                                                                                                                                                                 |                   |
| <b>Corresponding Author Secondary Information:</b>   |                                                                                                                                                                                                                                                                                                                                                                                                                                                                                                                                                                                                                                                                                                                                                                                                                                                                                                                                                                                                                                                                                                                                                                                                                                                                                                                                                                                                                                                                                                                                                                                                                                                                                                                                                                                                                                                                                                                            |                   |
| <b>Corresponding Author's Institution:</b>           |                                                                                                                                                                                                                                                                                                                                                                                                                                                                                                                                                                                                                                                                                                                                                                                                                                                                                                                                                                                                                                                                                                                                                                                                                                                                                                                                                                                                                                                                                                                                                                                                                                                                                                                                                                                                                                                                                                                            |                   |
| <b>Corresponding Author's Secondary Institution:</b> |                                                                                                                                                                                                                                                                                                                                                                                                                                                                                                                                                                                                                                                                                                                                                                                                                                                                                                                                                                                                                                                                                                                                                                                                                                                                                                                                                                                                                                                                                                                                                                                                                                                                                                                                                                                                                                                                                                                            |                   |
| <b>First Author:</b>                                 | Shuang Jiang                                                                                                                                                                                                                                                                                                                                                                                                                                                                                                                                                                                                                                                                                                                                                                                                                                                                                                                                                                                                                                                                                                                                                                                                                                                                                                                                                                                                                                                                                                                                                                                                                                                                                                                                                                                                                                                                                                               |                   |
| <b>First Author Secondary Information:</b>           |                                                                                                                                                                                                                                                                                                                                                                                                                                                                                                                                                                                                                                                                                                                                                                                                                                                                                                                                                                                                                                                                                                                                                                                                                                                                                                                                                                                                                                                                                                                                                                                                                                                                                                                                                                                                                                                                                                                            |                   |
| <b>Order of Authors:</b>                             | Shuang Jiang                                                                                                                                                                                                                                                                                                                                                                                                                                                                                                                                                                                                                                                                                                                                                                                                                                                                                                                                                                                                                                                                                                                                                                                                                                                                                                                                                                                                                                                                                                                                                                                                                                                                                                                                                                                                                                                                                                               |                   |
|                                                      | Haishan An                                                                                                                                                                                                                                                                                                                                                                                                                                                                                                                                                                                                                                                                                                                                                                                                                                                                                                                                                                                                                                                                                                                                                                                                                                                                                                                                                                                                                                                                                                                                                                                                                                                                                                                                                                                                                                                                                                                 |                   |
|                                                      | Fangjie Xu                                                                                                                                                                                                                                                                                                                                                                                                                                                                                                                                                                                                                                                                                                                                                                                                                                                                                                                                                                                                                                                                                                                                                                                                                                                                                                                                                                                                                                                                                                                                                                                                                                                                                                                                                                                                                                                                                                                 |                   |

|                                                                                                                                                                                                                                                                                                                                                                                                                                                                                                                                     |                 |
|-------------------------------------------------------------------------------------------------------------------------------------------------------------------------------------------------------------------------------------------------------------------------------------------------------------------------------------------------------------------------------------------------------------------------------------------------------------------------------------------------------------------------------------|-----------------|
|                                                                                                                                                                                                                                                                                                                                                                                                                                                                                                                                     | Xueying Zhang   |
| <b>Order of Authors Secondary Information:</b>                                                                                                                                                                                                                                                                                                                                                                                                                                                                                      |                 |
| <b>Additional Information:</b>                                                                                                                                                                                                                                                                                                                                                                                                                                                                                                      |                 |
| <b>Question</b>                                                                                                                                                                                                                                                                                                                                                                                                                                                                                                                     | <b>Response</b> |
| Are you submitting this manuscript to a special series or article collection?                                                                                                                                                                                                                                                                                                                                                                                                                                                       | No              |
| <p><b>Experimental design and statistics</b></p> <p>Full details of the experimental design and statistical methods used should be given in the Methods section, as detailed in our <a href="#">Minimum Standards Reporting Checklist</a>. Information essential to interpreting the data presented should be made available in the figure legends.</p> <p>Have you included all the information requested in your manuscript?</p>                                                                                                  | Yes             |
| <p><b>Resources</b></p> <p>A description of all resources used, including antibodies, cell lines, animals and software tools, with enough information to allow them to be uniquely identified, should be included in the Methods section. Authors are strongly encouraged to cite <a href="#">Research Resource Identifiers</a> (RRIDs) for antibodies, model organisms and tools, where possible.</p> <p>Have you included the information requested as detailed in our <a href="#">Minimum Standards Reporting Checklist</a>?</p> | Yes             |
| <p><b>Availability of data and materials</b></p> <p>All datasets and code on which the conclusions of the paper rely must be either included in your submission or deposited in <a href="#">publicly available repositories</a> (where available and ethically appropriate), referencing such data using a unique identifier in the references and in</p>                                                                                                                                                                           | Yes             |

the "Availability of Data and Materials" section of your manuscript.

Have you have met the above requirement as detailed in our [Minimum Standards Reporting Checklist?](#)

# 1 The chromosome-level genome assembly and annotation of the loquat 2 (*Eriobotrya japonica*) genome

3 Shuang Jiang<sup>†</sup>, Haishan An<sup>†</sup>, Fangjie Xu, Xueying Zhang\*

4 Forestry and Pomology Research Institute, Shanghai Key Lab of Protected Horticultural Technology,  
5 Shanghai Academy of Agricultural Sciences, Shanghai, 201403, China

6 <sup>†</sup>Equal contribution.

7 \***Correspondence:** Xueying Zhang; loquat\_zhang@126.com

8

## 9 **Abstract**

10 **Background:** The loquat (*Eriobotrya japonica*) is a species of flowering plant in the family  
11 Rosaceae, which is widely cultivated in Asian, European, and African countries. It flowered in the  
12 winter and ripen in the early summer. The genome of loquat was still not reported, which limited  
13 the study of molecular biology in the loquat. Here we used third-generation sequencing Nanopore  
14 and High-through chromosome conformation capture (Hi-C) technology to sequence the genome of  
15 the *Eriobotrya* to provide the reference to the researchers. **Findings:** We generated 100.10 Gb long  
16 reads using Nanopore sequencing technologies. Three Illumina high-throughput sequencing  
17 data, including Genome short reads (47.42 Gb), transcriptome short reads (11.06 Gb) and Hi-  
18 C short reads (67.25 Gb) were also sequenced to construct the loquat genome. All data were  
19 assembled into a 760.1 Mb genome assembly. The Hi-C technology assembled contigs into  
20 chromosomes based on the contacts between contigs and then assembled a genome with 17  
21 chromosomes and a scaffold N50 length of 39.7 Mb. A total of 45,743 protein-coding genes were  
22 annotated in the *Eriobotrya* genome, and we analyzed phylogenetic relationships between the  
23 *Eriobotrya* and the other six Rosaceae species. The *Eriobotrya* has a close relationship with *Malus*  
24 and *Pyrus*, and the divergence time of *Eriobotrya* and *Malus* was 6.76 million years ago.  
25 Furthermore, the chromosome rearrangement was found in *Eriobotrya* and *Malus*. **Conclusions:**  
26 We constructed the first high-quality chromosome-level *Eriobotrya* genome using Illumina,  
27 Nanopore, and Hi-C technologies. This work provides a valuable reference genome for the  
28 molecular studies of the loquat, and give a new insight of chromosome evolution in the loquat.

29

## 30 **Data Description**

### 31 **Background**

32 The genus *Eriobotrya* L. (common name loquat) is a species of flowering plant in the family  
33 Rosaceae [1], and about twenty-five species are classified by most taxonomists. Sixteen species  
34 were native in China [2]. Cultivated loquats in Asia mainly belong to *Eriobotrya japonica* (NCBI:  
35 txid 32224). The loquat was originated from China and has been also produced widely throughout  
36 other Asian countries (Japan and Korea), some southern European countries (Turkey, Italy, and  
37 France), and several Northern African countries (Morocco and Algeria) [3]. It is a large evergreen  
38 tree, grown commercially for its yellow or red fruit. The relationship of loquat, apple, pear, and  
39 peach are close [4]. In comparison, the maturity period of the loquat is in early summer, which is  
40 earlier than most of the fruits in a year. The loquat is evergreen and blooms in winter. The top buds  
41 become flowers. After flower bud differentiation, the loquat flowered without a long period of  
42 dormancy. The loquat has infinite inflorescence, and one inflorescence can pick up many fruits,  
43 which enhance the ability to adapt to the low temperature in the winter.

44 In the present study, we present a genome assembly for the loquat with 17 chromosomes and a  
45 genome size of 760 Mb. The genome assembly was created using Nanopore long reads and Hi-C  
46 data. Illumina paired-end sequence was used for the base and indel correction. The completeness  
47 and continuity of the genome were comparable with those of other important Rosaceae species. The  
48 high-quality reference genome generated in this study will facilitate research on population genetic  
49 traits and functional gene identification related to important characteristics of the loquat.

### 50 **Sample collection**

51 *Eriobotrya japonica* cv. Seventh Star is a cultivar bred by the team of Dr. Xueying Zhang in  
52 Shanghai Academy of Agricultural Sciences (SAAS, Shanghai, China) (Fig. 1), and it was widely  
53 cultivated in Shanghai, China. The young leaves were collected from an individual of Seventh Star  
54 on Mar. 20, 2019 at the experimental farm of SAAS in Zhuanghang Town (Fengxian, Shanghai,  
55 China). This tree was 14 years old and considered to be in the adult phase. The leaves were frozen  
56 in liquid nitrogen and stored at  $-80^{\circ}\text{C}$  until DNA extraction. Total genomic DNA was extracted  
57 from the leaf tissues following the CTAB protocol [5]. The leaf, fruit, bud, root, and branch were  
58 collected to RNA extraction.

### 59 **Estimation of genome size and heterozygosity analysis**

60 The qualified genomic DNA was randomly interrupted by ultrasonic oscillation into the  
61 fragment of 350 bp, and then a small fragment sequencing library was constructed by terminal repair,  
62 addition of A, addition of linker, target fragment selection, and PCR. The library was subjected to  
63 double-end 150 bp (PE 150) sequencing using an Illumina Hiseq 4000. The data was subjected to  
64 quality control and used for the analysis. The result showed that a total of 47.42 Gb data were  
65 obtained (Table 1). The reads were searched by the NT database, which confirmed that the sample  
66 is free from contamination. Evaluation of the chloroplast of the species revealed a very low extra-  
67 nuclear DNA content. The GC content of the genome is estimated to be approximately 39.65%.

68 Kmer is an oligonucleotide sequence of length k extracted from the sliding window of the  
69 sequencing data. Under the premise of uniform distribution of sequencing reads, the following  
70 formula is obtained:

$$71 \quad \text{Genomic size} = \frac{\text{total number of bases}}{\text{average sequencing depth}} = \frac{\text{total kmer}}{\text{average kmer depth}}$$

72 A kmer map of k=21 was constructed using 350 bp library data (Fig. 2) for evaluation of the  
73 genome size, repeat sequence ratio, and heterozygosity. The main peak corresponding to the kmer  
74 depth is 55, which is the average kmer depth. A sequence in which the kmer depth appears more  
75 than twice the main peak (depth value, 111) is a repeating sequence. The kmer depth appears at the  
76 half of the main peak (depth value, 27.5) means that this sequence is heterozygous. The total number  
77 of kmer obtained from the sequencing data was 41,072,179,362. After removing the kmer with  
78 abnormal depth, a total of 39,711,658,265 kmer were used for the genome size estimation, and the  
79 calculated genome length was about 710.83 Mbp, which was consistent with 654.40 Mbp estimated  
80 by flow cytometry [6]. According to the kmer distribution, the estimated repeat sequence ratio is  
81 about 54.56%. There is no obvious heterozygous peak, and the heterozygosity is a low value of  
82 0.48%. In summary, the loquat had a simple genome, which is conducive to the assembly of the  
83 genome.

#### 84 **Nanopore, Hi-C and RNA Sequencing**

85 Genomic DNA was extracted and sequenced following the Ligation Sequencing Kit (Nanopore,  
86 UK). The DNA was purified, and its quality was assessed by the Qubit 2.0 Fluorometer (Thermo  
87 Fisher, USA). The DNA was randomly interrupted and the fragments of ~20 kb were enriched and  
88 purified. Damaged DNA and ends were enzymatically repaired by NEBNext End Repair/dA-tailed

89 (NEB, UK). Then, a 20-kb library was constructed and sequenced by the Nanopore PromethION  
90 platform, according to the manufacturer's protocols. The data of about 106.23 Gb was obtained.  
91 After the data quality control, the final data volume was 100.10 Gb (Table 1). A Hi-C sample library  
92 was constructed by the fresh leaf of the loquat. The main process includes cross-linking DNA,  
93 restriction enzyme digestion, ends repair, DNA cyclization, and DNA purification. The library was  
94 sequenced by Illumina HiSeq 4000. A total of 67.25 Gb Clean Data was obtained and Q30 was  
95 94.38%. RNA-seq samples were obtained by mixing an equal amount of RNA extracted from each  
96 tissue (leaf, fruit, bud, root, and branch) and used for library construction. After sequencing on the  
97 Illumina HiSeq 4000 platform, we obtained 11.06 Gb of sequencing data (Table 1).

### 98 **Genome assembly based on Nanopore and Hi-C data**

99 In Nanopore sequencing data, the N50 and average length of the reads reached 18.06 and 16.15  
100 Kb respectively (Additional Table S1). According to the estimated genome size (710.83 Mbp), the  
101 sequencing depth was 131.69 x. The data were corrected by Canu software (Canu, RRID:  
102 SCR\_015880, v1.4 ) [7] to obtain high-accuracy data for smartdenovo assembly, and then Racon  
103 software [8] and Pilon software (Pilon, RRID: SCR\_01 4731, v1.21) [9] were used to calibrate the  
104 data. The total length of the draft genome sequence was 760.10 Mb composed of 597 contigs, and  
105 the contig N50 was 5.02 Mb.

106 BWA software (BWA, RRID: SCR\_010910, v0.7.15) [10] was used to map the Hi-C short  
107 reads obtained from the Illumina HiSeq with the draft genome. The number of unique mapped Read  
108 pairs was 135,734,826, which accounted for 60.42 % of total Read pairs. These unique Read pairs  
109 were evaluated by HiC-Pro [11] to compare the valid interaction pairs and the invalid interaction  
110 pairs mapped to the draft genome. The result showed that the percent of valid interaction pairs was  
111 73.97%. In conclusion, the Hi-C library has high quality. The contigs were interrupted by a length  
112 of 50 Kb and reassembled by Hi-C data. The position that could not be restored to the original  
113 assembled sequence was listed as a candidate error region, and then the low Hi-C coverage depth in  
114 this region confirmed this error. After the correction, 819 contigs were identified. LACHESIS  
115 software [12] was used to group, sort, and orient all contigs. 800 contigs could be mapped to 17  
116 chromosomes. In the assembled process, 305 contigs were capable of determining the order and  
117 direction accounted for 676.24 Mb (89.27%), which were assembled to the chromosomes  
118 (Additional Table S2). Finally, 17 chromosomes and 514 unplaced scaffolds were obtained in the

119 final chromosome-level genome (Table 2). The scaffold N50 was 39.7 Mb.

## 120 **Evaluation of assembly quality**

121 The integrity of the assembled genome was assessed. Firstly, BWA software (BWA, RRID:  
122 SCR\_010910, v0.7.15) [10] was used to compare the short reads obtained from the Illumina HiSeq  
123 sequencing data with the reference genome. The percent of mapped reads to the reference genome  
124 was up to 99.69%. Secondly, CEGMA (v2.5) [13] was used to assess the integrity of 458 conserved  
125 core genes for eukaryotes, 451 (98.47%) genes were present in the assembled genome. Thirdly, the  
126 database in Benchmarking Universal Single-Copy Orthologs (BUSCO, RRID:SCR\_015008, v2.0)  
127 [14] was used to assess the completeness of gene regions, which contains 1,440 conserved core  
128 genes. The results showed that 96.81% of the plant single-copy orthologues were complete.  
129 Complete single-copy and complete multi-copy genes accounted for 64.65% and 32.15%,  
130 respectively. Therefore, these results indicated that the loquat genome assembly has high quality  
131 and coverage.

## 132 **Genome annotation**

133 LTR\_FINDER (LTR\_FINDER, RRID:SCR\_015247) [15] and RepeatScout (RepeatScout,  
134 RRID:SCR\_014653) [16] software were used to de novo predict repetitive sequences in the loquat  
135 genome, and then all isolated sequences were classified by PASTEClassifier [17] and mapped to  
136 the database of Repbase using RepeatMasker (RepeatMasker, RRID:SCR\_012954) [18]. A total of  
137 449.72 Mb of repeat sequences were identified, accounting for 59.17% of the genome size (Table  
138 S3). Among these repeat sequences, 48.6% (369.44 Mb) and 9.65% (73.34 Mb) were predicted as  
139 Class I transposons and Class II retrotransposons (Additional Table S3). In Class I, *Copia*- and  
140 Gypsy- retrotransposons account for 15.84% (120.38 Mb) and 26.28% (199.73 Mb) respectively.  
141 In Class II, TIR- and Helitron- transposons account for 6.85% and 1.96% respectively. The result  
142 showed that the retrotransposons account for a large proportion of the loquat genome.

143 The protein coding genes were predicted based on three different strategies, including de novo  
144 prediction, homologous species prediction, and Unigene prediction. Genscan (Genscan,  
145 RRID:SCR\_012902) [19], Augustus (Augustus, RRID:SCR\_015981, v2.4) [20], GlimmerHMM  
146 (GlimmerHMM, RRID:SCR\_002654, v3.0.4) [21], GeneID (GeneID, RRID:SCR\_002473, v1.4)  
147 [22], and SNAP (SNAP, RRID:SCR\_005501) [23] were used in de novo prediction. GeMoMa  
148 (v1.3.1) [24] was used for prediction based on homologous species. The transcripts was assembled



149 by using Hisat (Hisat, RRID:SCR\_015530, v2.0.4) [25] and Stringtie (v1.2.3) [26] based on RNA-  
150 seq data, and then GeneMarkS-T (v5.1) [27] and PASA (PASA, RRID:SCR\_014656, v2.0.2) [28]  
151 were used for gene prediction. Finally, EVM (v1.1.1) [29] was used to integrate the prediction  
152 results obtained by the above three methods. The Venn diagram showed that 27,685 genes were  
153 predicted in all three strategies (Additional Fig. S1), and 45,743 genes accounted for 160.87 Mb  
154 were predicted (Additional Table S4). To better understand gene function, we searched all 45,743  
155 protein-coding genes to protein databases, including InterProScan, KEGG, SwissProt, and TrEMBL.  
156 Results showed that 98.69% of the genes could be annotated from these databases. The distribution  
157 of repetitive sequences and protein coding genes were shown in Fig. 3B, 3C.

158 Based on the Rfam database [30], Blastn (Blastn, RRID:SCR\_001598) was used for genome-  
159 wide alignment to identify microRNAs and rRNAs. tRNA was predicted by tRNAscan-SE  
160 (tRNAscan-SE, RRID:SCR:010835) [31]. A total of 656 tRNAs, 6,211 rRNAs, 121 miRNAs were  
161 predicted. GeneWise (GeneWise, RRID:SCR\_015054) [32] was used to find immature stop codons  
162 and frameshift mutations in the predicted genes to obtain pseudogenes, and 7,642 pseudogenes were  
163 obtained.

#### 164 **Gene clusters and duplication**

165 The protein sequence of *E. japonica* and its related six species (*Malus domestica*, *Prunus*  
166 *persica*, *Pyrus communis*, *Rubus occidentalis*, *Rosa chinensis*, and *Fragaria vesca*) were compared  
167 to analyze the duplication of genes and the classification of species-specific genes between species.  
168 The genome of all related species were downloaded from the database of Genome Database for  
169 Rosaceae. OrthoMCL software (OrthoMCL, RRID:SCR\_007839) [33] was used to find the gene  
170 family unique to all species. In *E. japonica*, 45,743 genes were grouped into 17,333 gene families  
171 (Table 4), which was more than other species. The number of genes and gene families in *E. japonica*  
172 was similar with *P. communis*, which had 45217 genes and 16875 gene families. *E. japonica* had  
173 665 unifamilies, suggesting these families were special in the loquat genome. The classification of  
174 genes showed that the single copy gene in loquat was less than other species, and 1849 single copy  
175 genes were identified. The loquat and pear had a large number of multiple copy genes (Fig. 4A).  
176 The gene expansion analysis showed that 182 genes were expanded in *E. japonica* compared with  
177 *M. domestica* and *P. communis*, including NB-ARC domain, transposase family tnp2, and  
178 Myb/SANT-like DNA-binding domain (Additional Table S5).

179 Due to limited computing power, fifty-one copy genes in loquat and six related species were  
180 randomly selected to construct a phylogenetic tree using MEGA (MEGA, RRID:SCR 000667,  
181 v7.0.26) software. The method of maximum-likelihood-based phylogenetic analyses were  
182 performed with *Rubus occidentalis* as the outgroup. Results indicated that the *Eriobotrya* has a close  
183 relationship with the *Malus* and *Pyrus* (Fig. 4). To further investigate the divergence time of these  
184 species, the MCMCTREE model was used. Fossil records were downloaded from the TIMETREE  
185 website [45] and used to calibrate the results. The divergence time of *Malus* and *Prunus* was set to  
186 45.50 million years ago. Results showed that the loquat diverged from the *Malus* ~6.76 million  
187 years ago (Fig. 4B).

188 4DTv (4-fold degenerate synonymous sites of the third codons) values were calculated  
189 according to the homologous gene pairs between the two species or the species itself. The 4DTv  
190 distribution map revealed two whole genome replication events. A divergence peak value (4DTv ~  
191 0.01) was observed in the *E. japonica* -vs- *P. communis* in the map, and a low values were found in  
192 the *E. japonica* -vs- *R. chinensis* (Fig. 4C), which suggested that the divergence of *E. japonica* and  
193 *P. communis* was relatively later than the divergence of *E. japonica* and *R. chinensis*. In a self-  
194 alignment of the chromosomes based on gene synteny, a peak value (0.05) was found in 4DTv value,  
195 suggesting that a whole-genome or large-fragment duplication occurred in the *Eriobotrya* genome.

#### 196 **Chromosome evolution between the *Malus*, *Prunus*, and *Eriobotrya* genomes**

197 The evolution of the *Eriobotrya* chromosomes and gene collinearity was evaluated using  
198 MCScan (version 0.8). The chromosomes of *Prunus* and *Malus* were used as reference genomes. A  
199 total of 26,557 and 40,928 gene pairs were found in inter-genomic comparison in *Eriobotrya* -vs-  
200 *Prunus* and *Eriobotrya* -vs- *Malus*, respectively. The alignments of syntenic chromosomes were  
201 visualized between *Malus*, *Prunus*, and *Eriobotrya* (Fig. 5A). The scattered points in *Eriobotrya* -  
202 vs- *Malus* were less than *Eriobotrya* -vs- *Prunus*, suggesting the close relationship between  
203 *Eriobotrya* and *Malus*. The frequency of large-scale fragment rearrangements among *Malus*, *Prunus*,  
204 and *Eriobotrya*, including inversions and translocations (Fig. 5B). In the comparison of *Prunus*, and  
205 *Eriobotrya*, Sac1, 4, and 8 in *Prunus* had duplicated (Fig. 5A). Sac1 divided into LG07/LG08 and  
206 LG06/LG15 in *Eriobotrya*. Sac4 and Sac8 were combined and formed LG01 and LG02. Sac5 was  
207 not duplicated and formed LG14 in *Eriobotrya*, suggesting that the other Sac5 was lost in the whole  
208 genome duplication. In the comparison of *Malus*, and *Eriobotrya*, C05 and C10 in *Malus* were

209 combined and formed LG01 and LG02 in *Eriobotrya*. C09 and C17 formed LG11 and LG13. One-  
210 to-one corresponding chromosome was not detected, suggesting that the fragment rearrangements  
211 widely occurred in the chromosomes of *Malus* and *Eriobotrya*. These findings implied that *Malus*,  
212 *Prunus*, and *Eriobotrya* shared some regions of chromosome and extensive chromosome  
213 rearrangements occurred. Overall, these findings a new insight on the evolution of *Eriobotrya*  
214 chromosomes.

215

## 216 **Discussion**

217 As far as our knowledge, this is the first report of the chromosome-level genome assembly of  
218 *E. japonica* using third-generation sequencing Nanopore and High-through chromosome  
219 conformation capture technology. A total of 45,743 high-quality protein coding genes were  
220 annotated by integrating results from 3 different methods including de novo prediction, homologous  
221 species prediction, and Unigene prediction. Phylogenetic analysis indicated that the *Eriobotrya* is  
222 closely related to the *Malus*. The analysis showed that a whole-genome or large-fragment  
223 duplication occurred in the *Eriobotrya* genome. The chromosomal rearrangement was found in  
224 *Eriobotrya* and *Malus*. This work provide a valuable chromosome-level genomic data for the loquat,  
225 and important genomic data for studying the loquat traits.

226

## 227 **Abbreviations**

228 4DTv: 4-fold degenerate synonymous sites of the third codons; BLAST: Basic Local Alignment  
229 Search Tool; bp: base pairs; Gb: gigabase pairs; GO: Gene Ontology; Hi-C: high-throughput  
230 chromosome conformation capture; HiSeq: high-throughput sequencing; kb: kilobase pairs; KEGG:  
231 Kyoto Encyclopedia of Genes and Genomes; Mb: megabase pairs; miRNA: MicroRNA; RNA-seq:  
232 RNA-sequencing; rRNA: ribosomal RNA; TrEMBL: a database of translated proteins from  
233 European Bioinformatics Institute; tRNA: Transfer RNA.

234

## 235 **Conflict of interest**

236 The authors declare that they have no competing interests.

237

## 238 **Author contributions**

239 Shuang Jiang performed the experiments and wrote the manuscript. Haishan An helped to collect  
240 the samples and revise the manuscript. Fangjie Xu helped to analyze the data and revise the  
241 manuscript. Xueying Zhang involved in designing the research and revised the manuscript. All  
242 authors read and approved the manuscript.

243

#### 244 **Availability of supporting data and materials**

245 All sequencing data have been deposited in the BIG Data Center, Beijing Institute of Genomics  
246 (BIG), Chinese Academy of Sciences under BioProject number PRJCA001836. For genome  
247 assembly data, the accession number is GWHAAZU00000000 in Genome Warehouse in BIG. The  
248 run of clean reads in Nanopore, Illumina HiSeq, HiC, and RNA-seq were deposited in Genome  
249 Sequence Archive in BIG under the accession number of CRR078404~CRR078407. The annotation  
250 files of the genome (gff3, NR annotation files, et al.) was deposited in Baidu Cloud Disk  
251 (<https://pan.baidu.com/s/1ALo86W-45mgvZ7MgrWLWvA>, password: 1ku4).

252

#### 253 **Funding**

254 This work was financed by a Grant from the National Natural Science Foundation of China (No.  
255 31701886) and A Grant for Agriculture Applied Technology Development Program from Shanghai  
256 Agriculture Committee (2015-6-2-2).

257

#### 258 **References:**

- 259 1. Lindley J. *Eriobotrya japonica*. Transactions of the Linnean Society of London. 1821;13 1:102.
- 260 2. Yang X, Glakpe K, Lin S, Hu Y, He Y, Nguyen TCN, et al. Taxa of plants of genus *Eriobotrya*  
261 around the world and native to Southeastern Asia. Journal of Fruit Science (in Chinese). 2005;22  
262 1:55-9.
- 263 3. Li GF, Zhang ZK and Lin SQ. Origin and evolution of *eriobotrya*. Acta Horticulturae.  
264 2011;887:33-7.
- 265 4. Lo EY and Donoghue MJ. Expanded phylogenetic and dating analyses of the apples and their  
266 relatives (Pyreae, Rosaceae). Molecular phylogenetics and evolution. 2012;63 2:230-43.  
267 doi:10.1016/j.ympev.2011.10.005.
- 268 5. Doyle JJ and Doyle JL. A rapid DNA isolation procedure for small quantities of fresh leaf tissue.  
269 Phytochem Bull. 1987;19:11-5.
- 270 6. Zhang ZK, Wang YQ, Lin SQ and Du K. Ploidy identification of loquats for genome sequencing  
271 project by flow cytometry. Journal of Fruit Science. 2012;29 3:498-504 (in chinese).
- 272 7. Koren S, Walenz BP, Berlin K, Miller JR, Bergman NH and Phillippy AM. Canu: scalable and

- 273 accurate long-read assembly via adaptive k-mer weighting and repeat separation. *Genome Res.*  
274 2017;27 5:722-36. doi:10.1101/gr.215087.116.
- 275 8. Vaser R, Sovic I, Nagarajan N and Sikic M. Fast and accurate de novo genome assembly from  
276 long uncorrected reads. *Genome Res.* 2017;27 5:737-46. doi:10.1101/gr.214270.116.
- 277 9. Walker BJ, Abeel T, Shea T, Priest M, Abouelliel A, Sakthikumar S, et al. Pilon: an integrated  
278 tool for comprehensive microbial variant detection and genome assembly improvement. *Plos*  
279 *One.* 2014;9 11:e112963. doi:10.1371/journal.pone.0112963.
- 280 10. Li H and Durbin R. Fast and accurate short read alignment with Burrows-Wheeler transform.  
281 *Bioinformatics.* 2009;25 14:1754-60. doi:10.1093/bioinformatics/btp324.
- 282 11. Servant N, Varoquaux N, Lajoie BR, Viara E, Chen CJ, Vert JP, et al. HiC-Pro: an optimized  
283 and flexible pipeline for Hi-C data processing. *Genome Biol.* 2015;16:259. doi:10.1186/s13059-  
284 015-0831-x.
- 285 12. Burton JN, Adey A, Patwardhan RP, Qiu R, Kitzman JO and Shendure J. Chromosome-scale  
286 scaffolding of de novo genome assemblies based on chromatin interactions. *Nat Biotechnol.*  
287 2013;31 12:1119-25. doi:10.1038/nbt.2727.
- 288 13. Parra G, Bradnam K and Korf I. CEGMA: a pipeline to accurately annotate core genes in  
289 eukaryotic genomes. *Bioinformatics.* 2007;23 9:1061-7. doi:10.1093/bioinformatics/btm071.
- 290 14. Simao FA, Waterhouse RM, Ioannidis P, Kriventseva EV and Zdobnov EM. BUSCO: assessing  
291 genome assembly and annotation completeness with single-copy orthologs. *Bioinformatics.*  
292 2015;31 19:3210-2. doi:10.1093/bioinformatics/btv351.
- 293 15. Xu Z and Wang H. LTR\_FINDER: an efficient tool for the prediction of full-length LTR  
294 retrotransposons. *Nucleic Acids Res.* 2007;35 Web Server issue:W265-8.  
295 doi:10.1093/nar/gkm286.
- 296 16. Price AL, Jones NC and Pevzner PA. De novo identification of repeat families in large genomes.  
297 *Bioinformatics.* 2005;21 Suppl 1:i351-8. doi:10.1093/bioinformatics/bti1018.
- 298 17. Hoede C, Arnoux S, Moisset M, Chaumier T, Inizan O, Jamilloux V, et al. PASTEC: an  
299 automatic transposable element classification tool. *Plos One.* 2014;9 5:e91929.  
300 doi:10.1371/journal.pone.0091929.
- 301 18. Tarailo- Graovac M and Chen N. Using RepeatMasker to identify repetitive elements in  
302 genomic sequences. *Current Protocols in Bioinformatics.* 2009;4 10:11-4.
- 303 19. Burge C and Karlin S. Prediction of complete gene structures in human genomic DNA. *Journal*  
304 *of molecular biology.* 1997;268 1:78-94. doi:10.1006/jmbi.1997.0951.
- 305 20. Stanke M and Waack S. Gene prediction with a hidden Markov model and a new intron  
306 submodel. *Bioinformatics.* 2003;19 Suppl 2:ii215-25. doi:10.1093/bioinformatics/btg1080.
- 307 21. Majoros WH, Pertea M and Salzberg SL. TigrScan and GlimmerHMM: two open source ab  
308 initio eukaryotic gene-finders. *Bioinformatics.* 2004;20 16:2878-9.  
309 doi:10.1093/bioinformatics/bth315.
- 310 22. Blanco E, Parra G and Guigó R. Using geneid to identify genes. *Current protocols in*  
311 *bioinformatics.* 2007;4 3:1-28.
- 312 23. Korf I. Gene finding in novel genomes. *BMC Bioinformatics.* 2004;5:59. doi:10.1186/1471-  
313 2105-5-59.
- 314 24. Keilwagen J, Hartung F, Paulini M, Twardziok SO and Grau J. Combining RNA-seq data and  
315 homology-based gene prediction for plants, animals and fungi. *BMC Bioinformatics.* 2018;19  
316 1:189. doi:10.1186/s12859-018-2203-5.

- 317 25. Kim D, Langmead B and Salzberg SL. HISAT: a fast spliced aligner with low memory  
318 requirements. *Nature methods*. 2015;12 4:357-60. doi:10.1038/nmeth.3317.
- 319 26. Pertea M, Pertea GM, Antonescu CM, Chang TC, Mendell JT and Salzberg SL. StringTie  
320 enables improved reconstruction of a transcriptome from RNA-seq reads. *Nat Biotechnol*.  
321 2015;33 3:290-5. doi:10.1038/nbt.3122.
- 322 27. Tang S, Lomsadze A and Borodovsky M. Identification of protein coding regions in RNA  
323 transcripts. *Nucleic Acids Res*. 2015;43 12:e78. doi:10.1093/nar/gkv227.
- 324 28. Campbell MA, Haas BJ, Hamilton JP, Mount SM and Buell CR. Comprehensive analysis of  
325 alternative splicing in rice and comparative analyses with Arabidopsis. *BMC Genomics*.  
326 2006;7:327. doi:10.1186/1471-2164-7-327.
- 327 29. Haas B, Salzberg S, Zhu W, Pertea M, Allen J, Orvis J, et al. Automated eukaryotic gene  
328 structure annotation using EVIDENCEModeler and the Program to Assemble Spliced Alignments.  
329 *Genome Biol* 2008;9:R7.
- 330 30. Griffiths-Jones S, Moxon S, Marshall M, Khanna A, Eddy SR and Bateman A. Rfam: annotating  
331 non-coding RNAs in complete genomes. *Nucleic Acids Res*. 2005;33 Database issue:D121-4.  
332 doi:10.1093/nar/gki081.
- 333 31. Lowe TM and Eddy SR. tRNAscan-SE: a program for improved detection of transfer RNA  
334 genes in genomic sequence. *Nucleic Acids Res*. 1997;25 5:955-64. doi:10.1093/nar/25.5.955.
- 335 32. Birney E, Clamp M and Durbin R. GeneWise and Genomewise. *Genome Res*. 2004;14 5:988-  
336 95. doi:10.1101/gr.1865504.
- 337 33. Li L, Stoeckert CJ, Jr. and Roos DS. OrthoMCL: identification of ortholog groups for eukaryotic  
338 genomes. *Genome Res*. 2003;13 9:2178-89. doi:10.1101/gr.1224503.

339

340

341

342

343 **Figure legends**

344

345 Figure 1 The loquat of seventh star (*Eriobotrya japonica*).

346

347 Figure 2 The Kmer analysis (K=23) of *Eriobotrya japonica* genome characteristics.

348

349 Figure 3 Summary of the de novo genome assembly and sequencing analysis of *Eriobotrya japonica*.

350 A, Chromosome number; B, numbers of repeat sequences per Mb; C, numbers of protein coding

351 genes per Mb; and D paralogous relationships between *E. japonica* chromosomes.

352

353 Figure 4 The genome evolution of *Eriobotrya*. (A) Comparison of copy numbers in gene clusters of

354 *Eriobotrya* genomes and six related species genomes. (B) Constructed phylogenetic tree and

355 divergence time estimation. (C) 4DTV analyses in *Eriobotrya* and related species.

356

357 Figure 5 The chromosomes collinearity among *Malus*, *Prunus* and *Eriobotrya*. (A) The inter-

358 genomic comparison. (B) The chromosomes map in three species.

359

360 **Additional files**

361

362 Additional Figure S1 COG function classification of all unigenes.

363 Additional Table S1 The sequence length of reads in Nanopore.

364 Additional Table S2 The details of the distribution of each chromosome sequences

365 Additional Table S3 The details of repeat sequences in the loquat genome.

366 Additional Table S4 Gene prediction result statistics

367 Additional Table S5 The number of expansion gene in *E. japonica* compared with *M. domestica* and

368 *P. communis*.

369

370

371 Table 1: Sequencing data used for loquat genome assembly and annotation

| Sequencing type           | Platform            | Library size<br>(bp) | Clean data<br>(Gb) | Application                      |
|---------------------------|---------------------|----------------------|--------------------|----------------------------------|
| Genome short reads        | Illumina HiSeq 4000 | 350                  | 47.42              | Genome survey and assessment     |
| Nanopore reads            | Nanopore platform   | 20000                | 100.10             | Contig assembly                  |
| Hi-C reads                | Illumina HiSeq 4000 | 300-700              | 67.25              | Chromosome construction          |
| Transcriptome short reads | Illumina HiSeq 4000 | 200-500              | 11.06              | Genome annotation and assessment |

372

373

374



375 Table 2 Assembly statistics

|                  | Software                      | Assembly level | Number of sequences   | N50 (Mb) | size (Gb)    |
|------------------|-------------------------------|----------------|-----------------------|----------|--------------|
| Nanopore         | Smartdenovo, Racon, and Pilon | contig         | 597                   | 5.0      | 760.1        |
| Nanopore and Hic | Lachesis                      | chromosome     | 17 + 514 <sup>a</sup> | 39.7     | 676.2 + 83.9 |

376 <sup>a</sup>There are 514 unplaced scaffolds in the final chromosome-level assembly. These unplaced contigs  
 377 comprise ~10.73% of total bases in the genome assembly size.

378

379

380 Table 3 Repeat sequences in the loquat genome

| Type*            | Number  | Length (bp) | Rate (%) |
|------------------|---------|-------------|----------|
| ClassI/LTR/Copia | 141,908 | 120,380,193 | 15.84    |
| ClassI/LTR/Gypsy | 183,863 | 199,727,884 | 26.28    |
| ClassII/Helitron | 45,852  | 14,912,320  | 1.96     |
| ClassII/TIR      | 140,384 | 52,101,491  | 6.85     |
| Other            | 184,400 | 62,606,412  | 8.24     |
| Total            | 669,919 | 449,728,153 | 59.17    |

381 \*The main type of repeat sequences were shown.

382

383

384 Table 4 The statistics of gene family classification in seven species.

| Species                | Total genes | Cluster number | Total family | Uni family |
|------------------------|-------------|----------------|--------------|------------|
| <i>E. japonica</i>     | 45,743      | 39,294         | 17,333       | 665        |
| <i>M. domestica</i>    | 28,306      | 20,426         | 12,797       | 365        |
| <i>P. communis</i>     | 45,217      | 32,764         | 16,875       | 819        |
| <i>P. persica</i>      | 26,873      | 22,583         | 14,969       | 310        |
| <i>R. occidentalis</i> | 33,253      | 24,641         | 15,479       | 1,241      |
| <i>F. vesca</i>        | 24,034      | 21,789         | 14,859       | 196        |
| <i>R. chinensis</i>    | 30,214      | 26,705         | 15,326       | 473        |

385

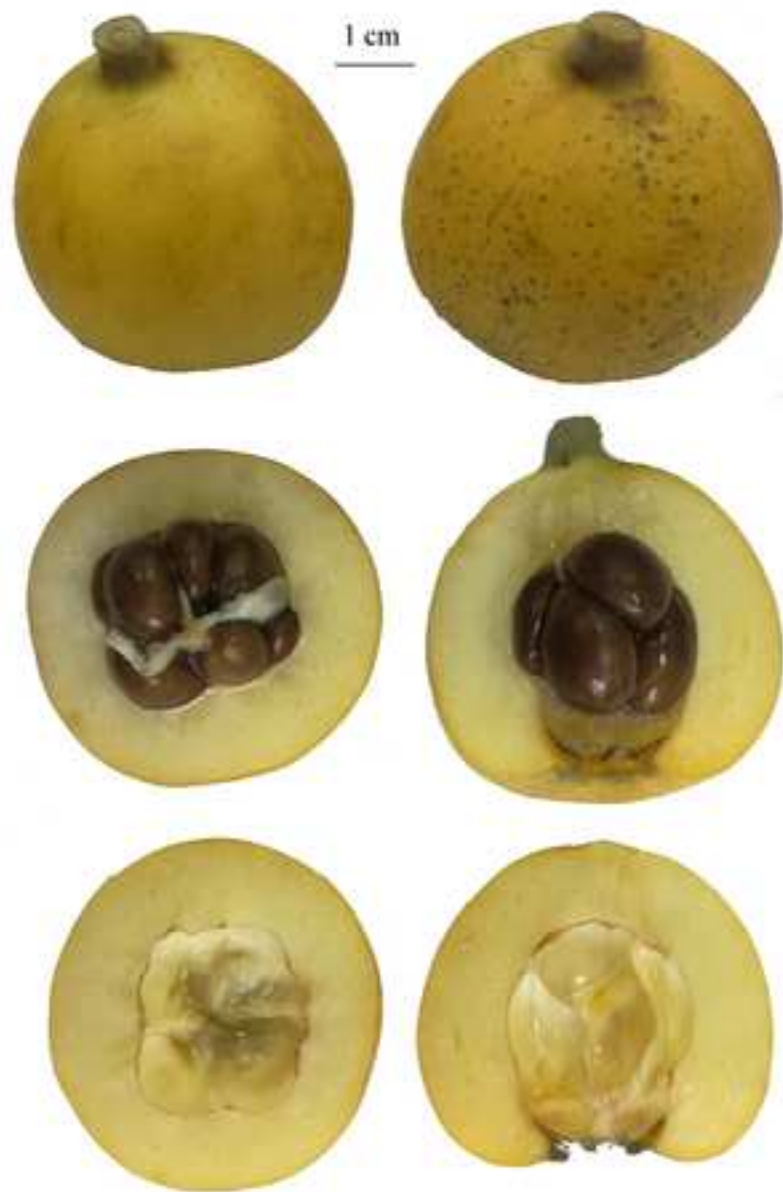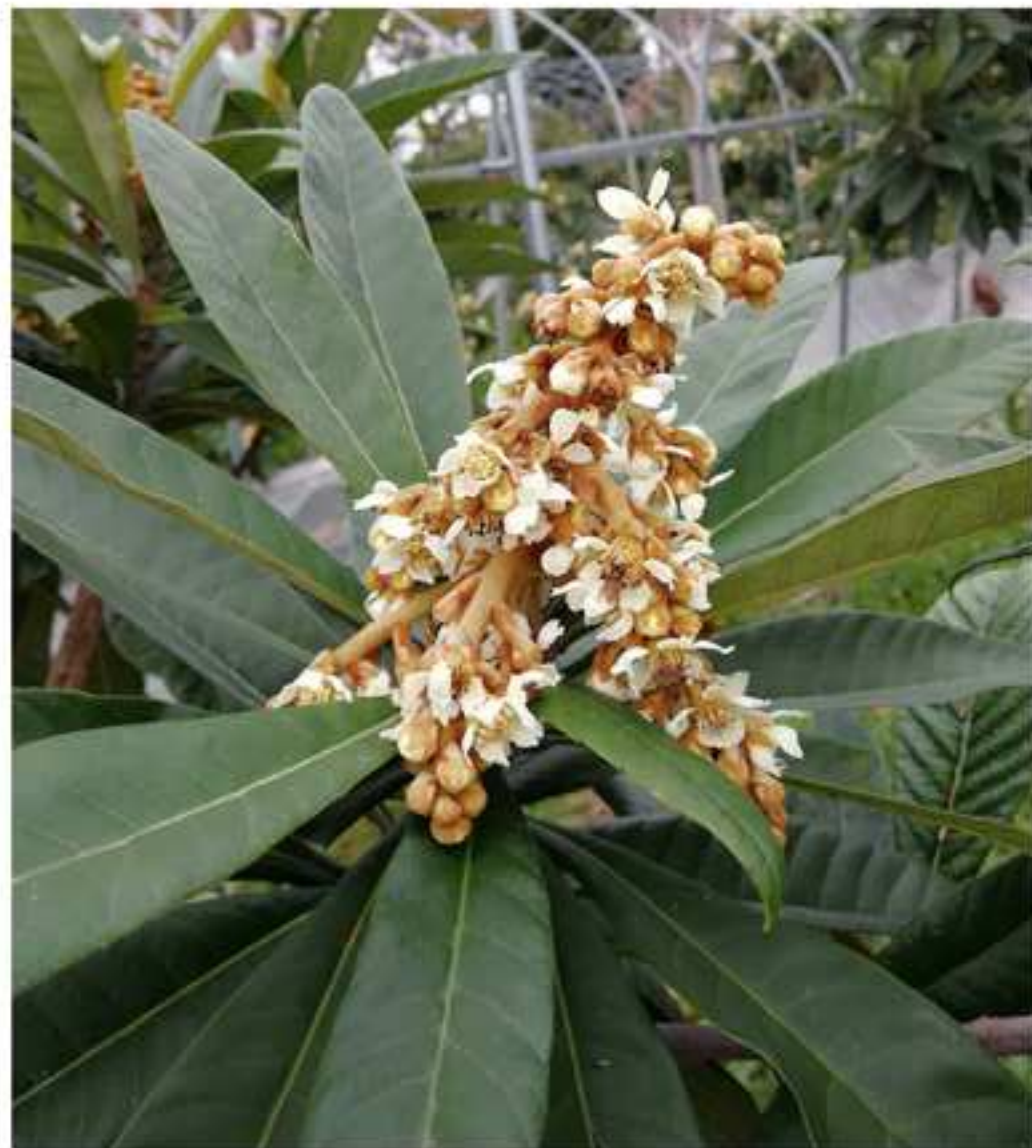

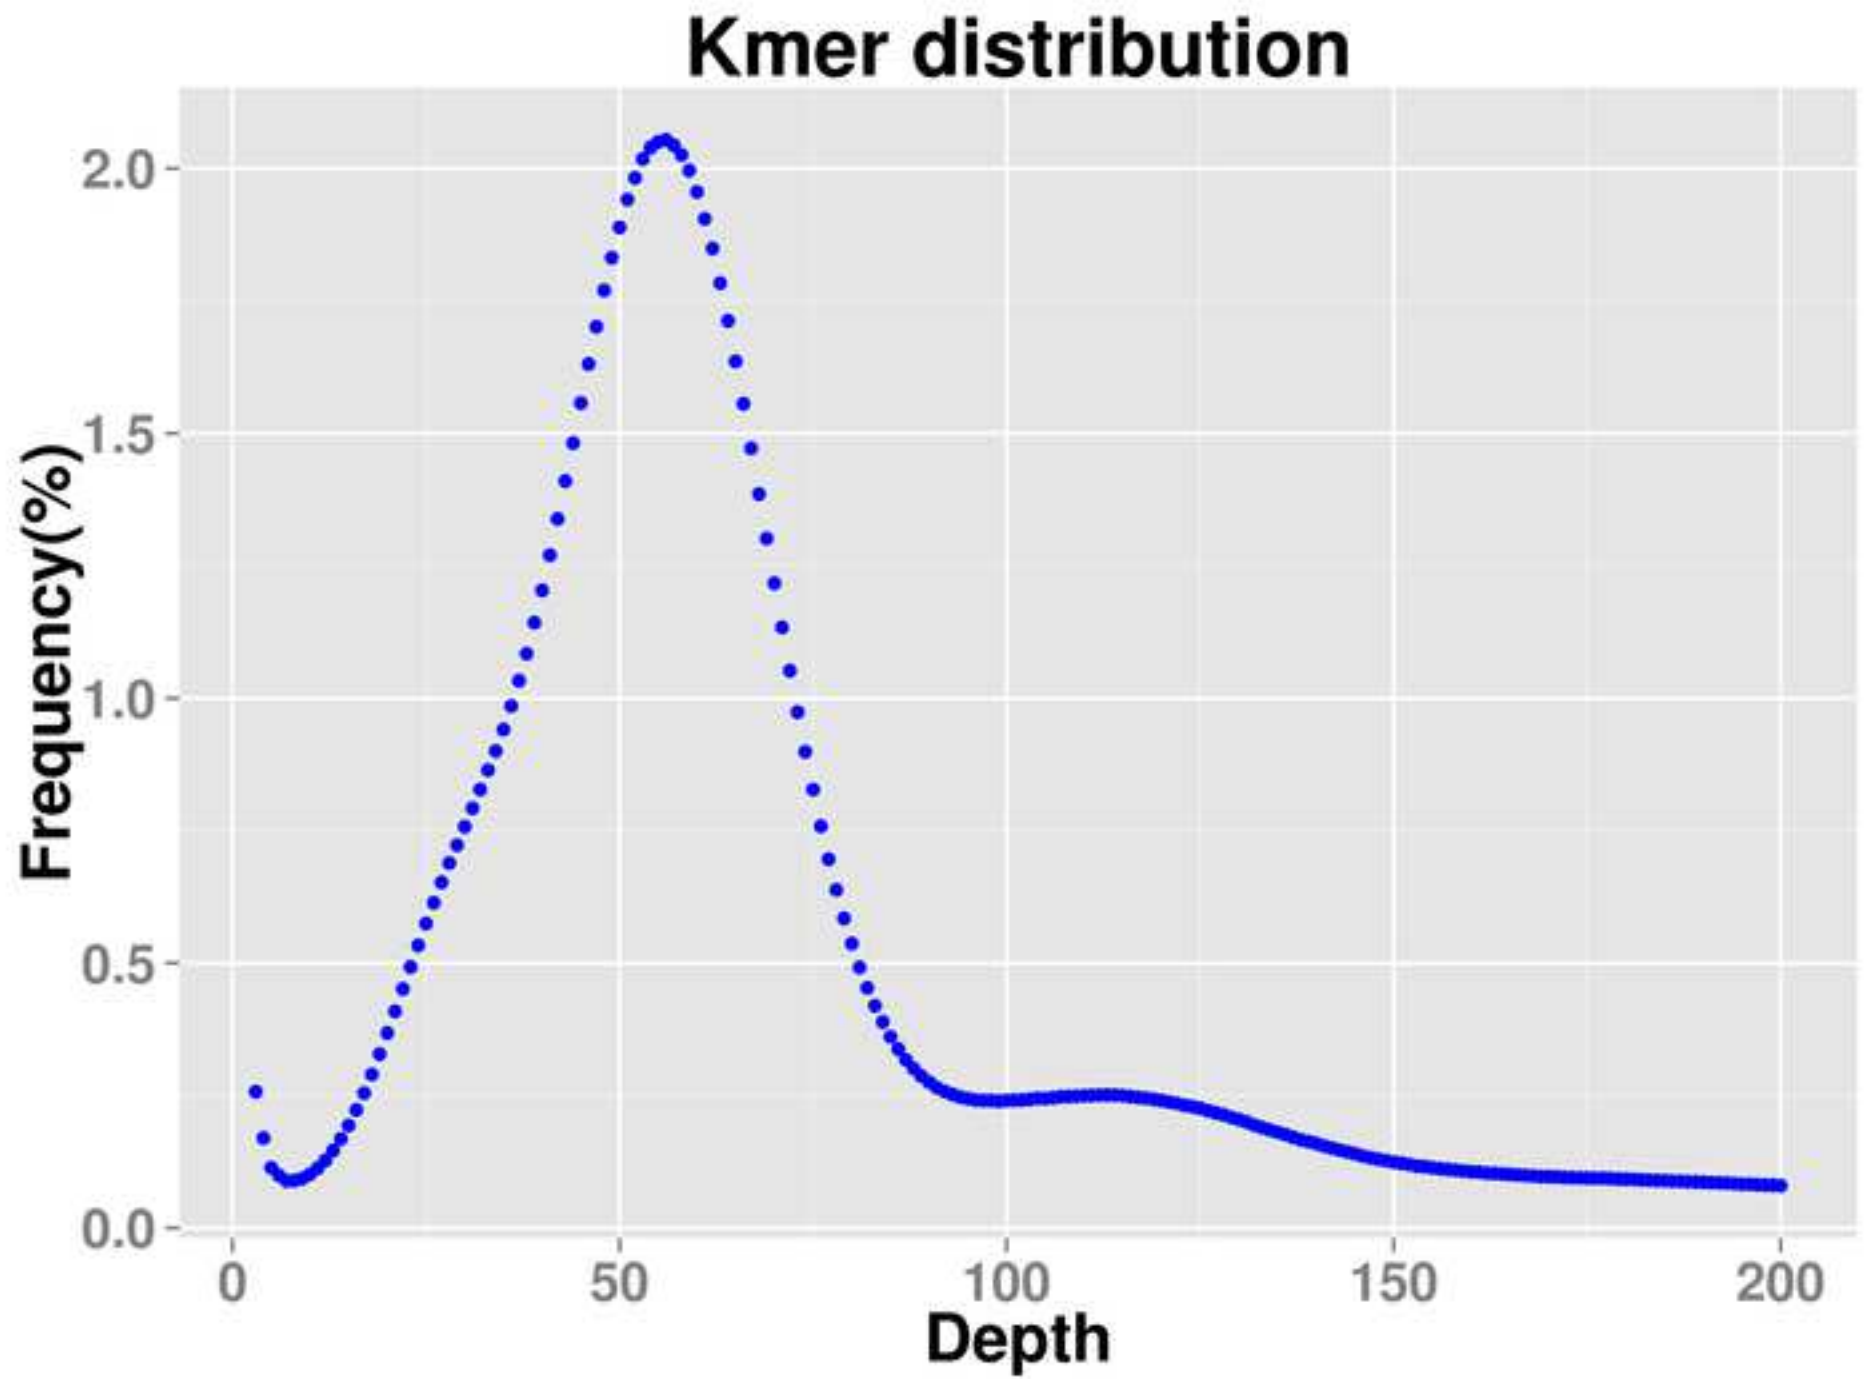

Figure 3

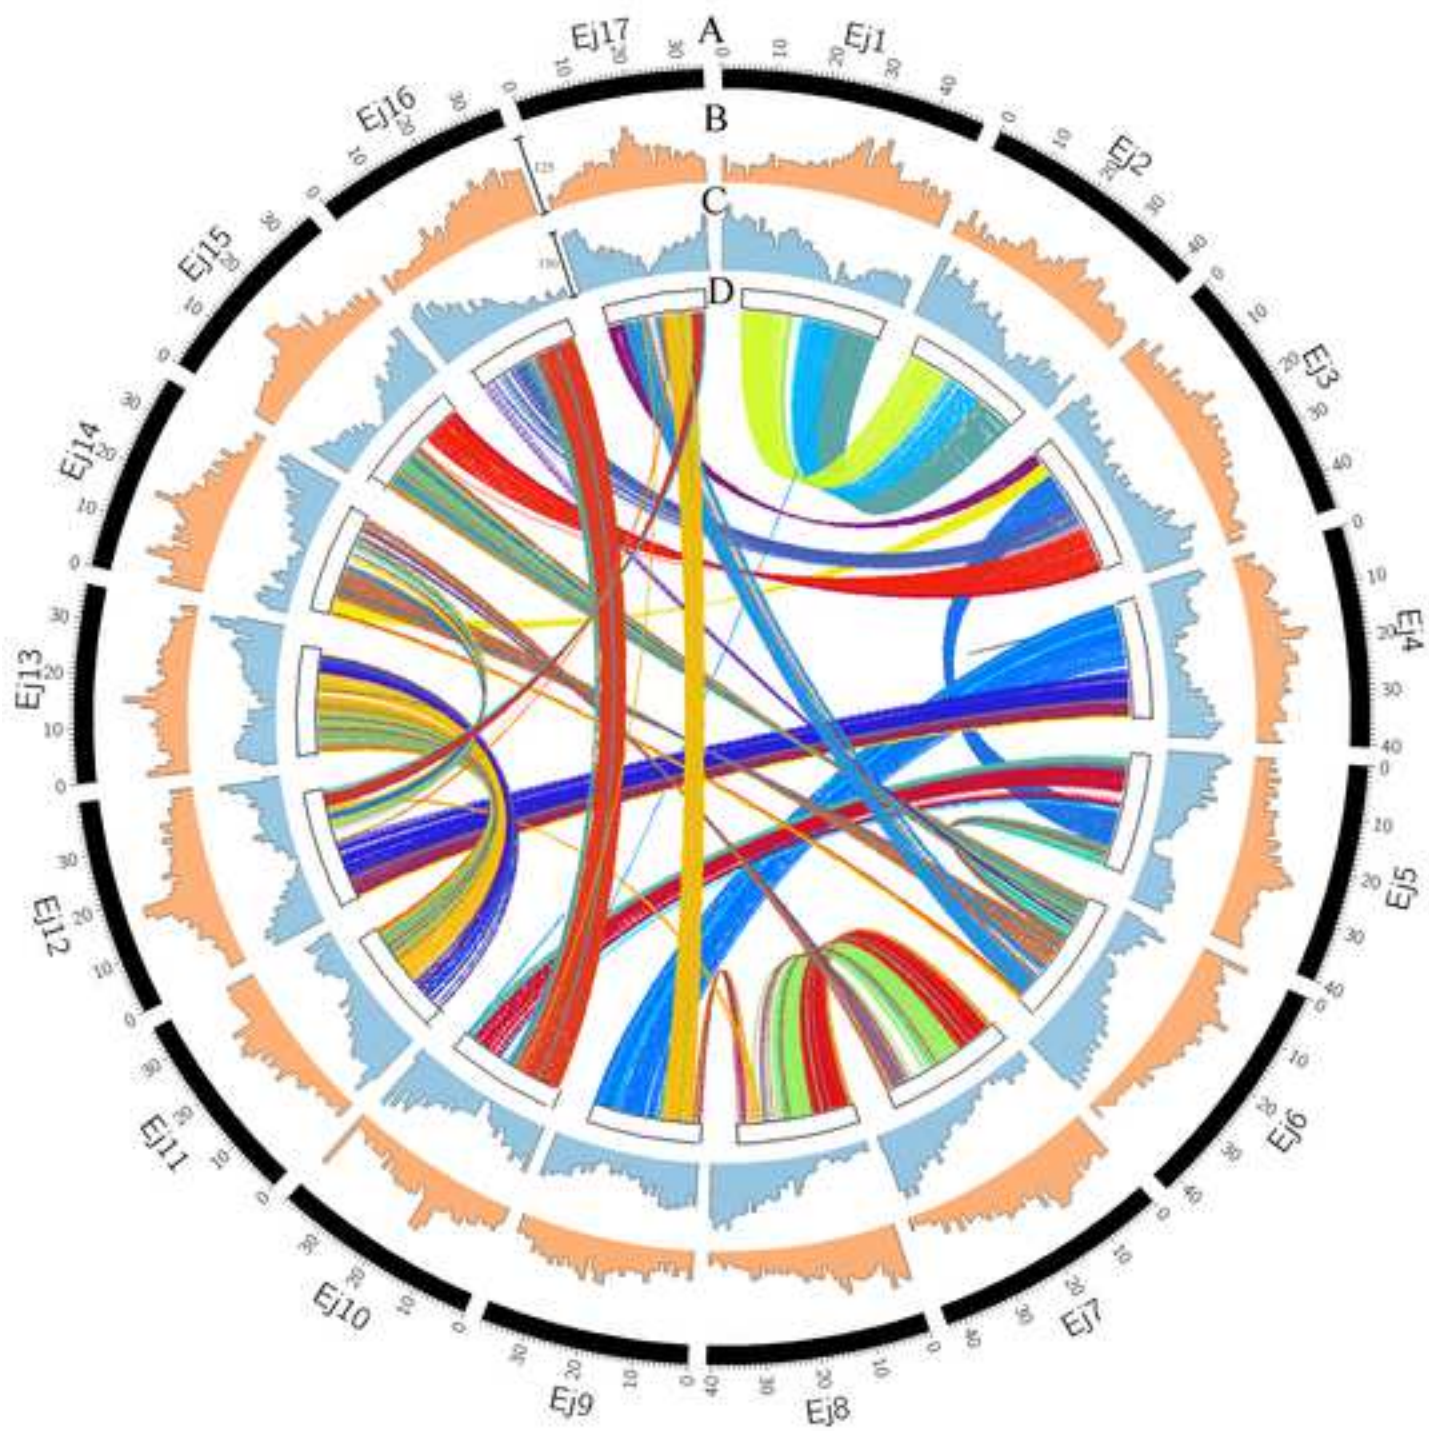

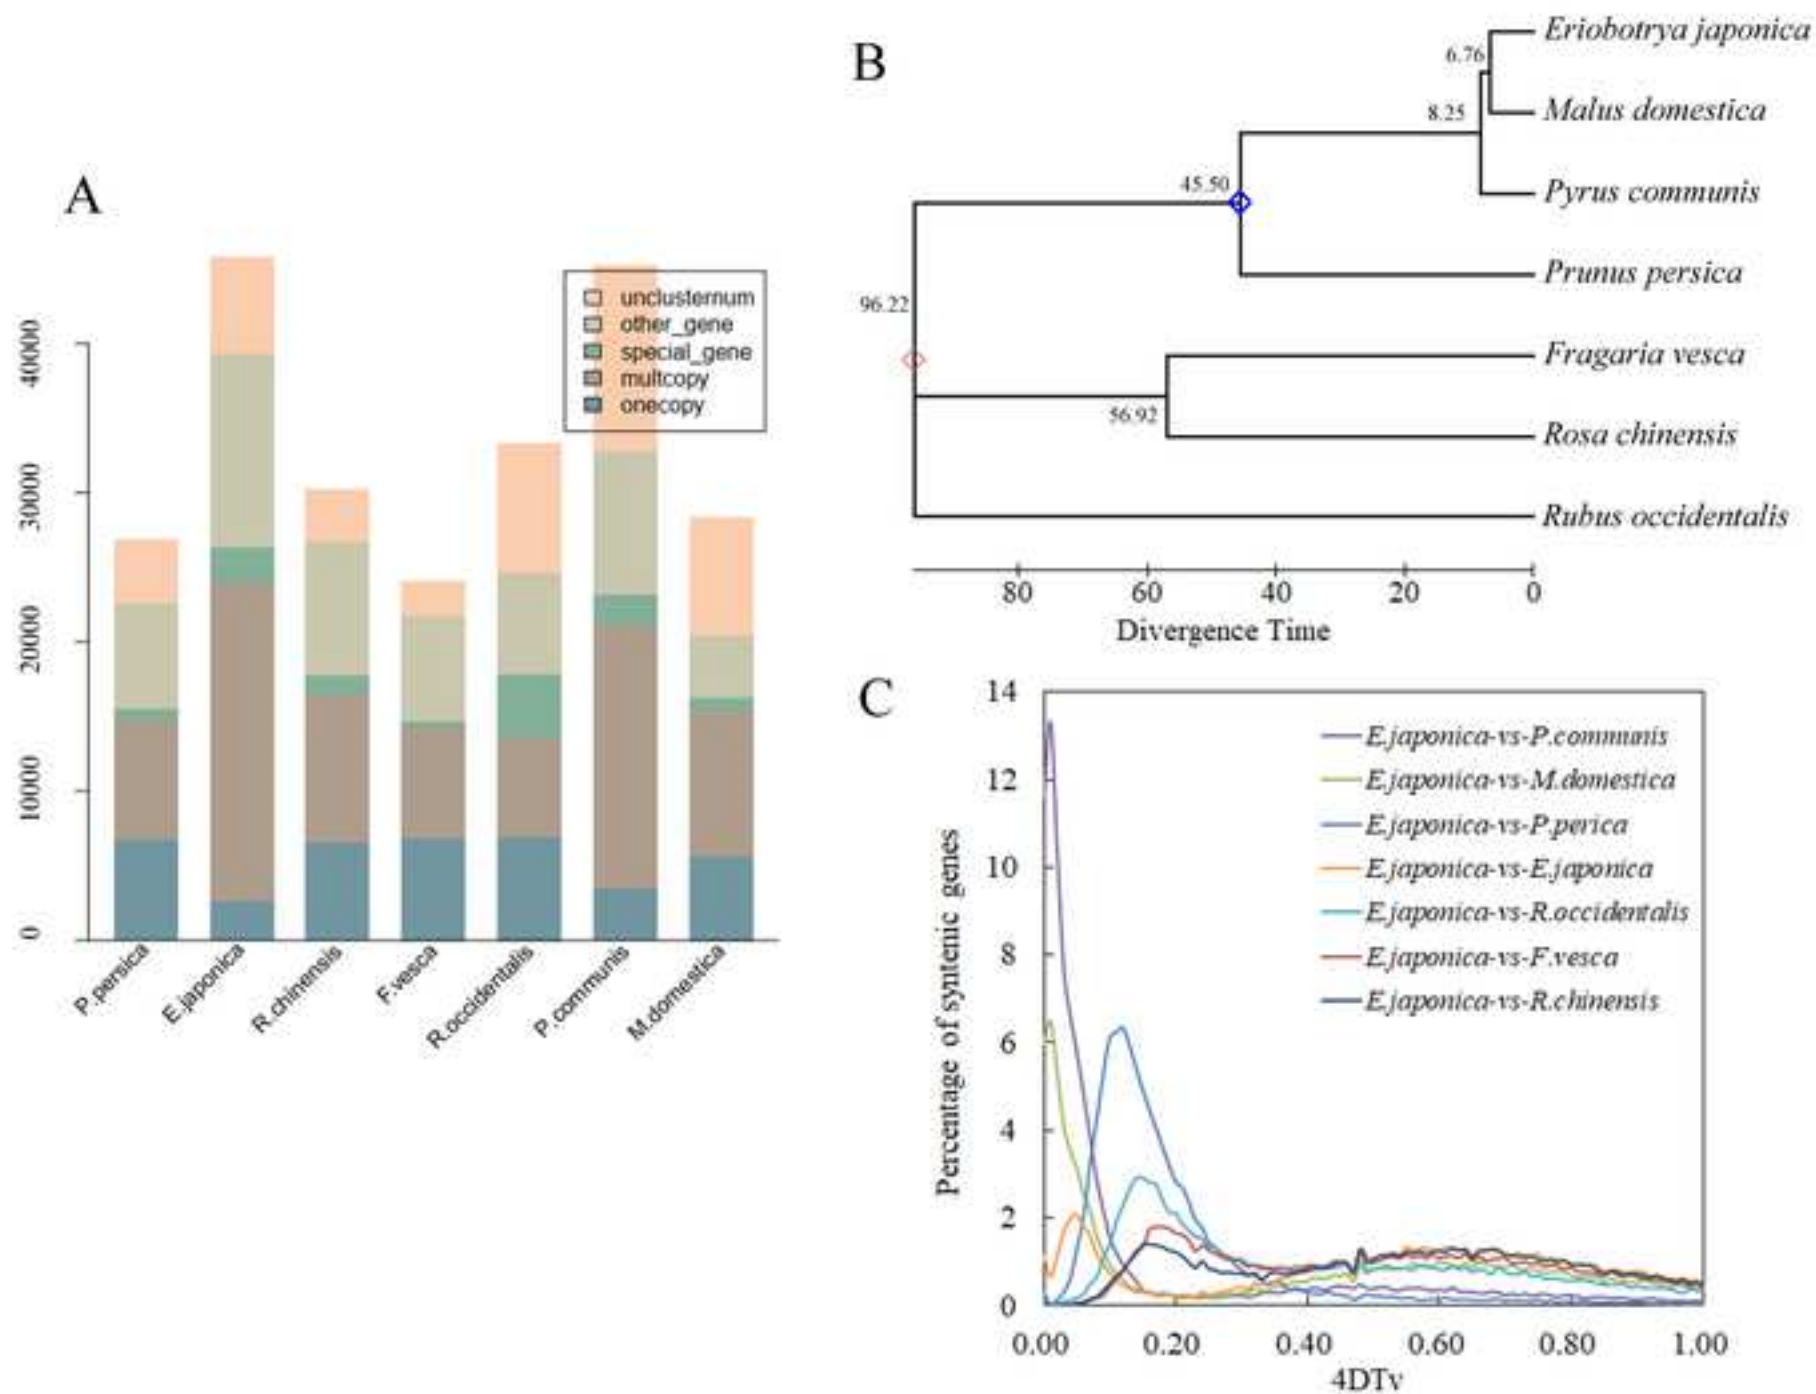

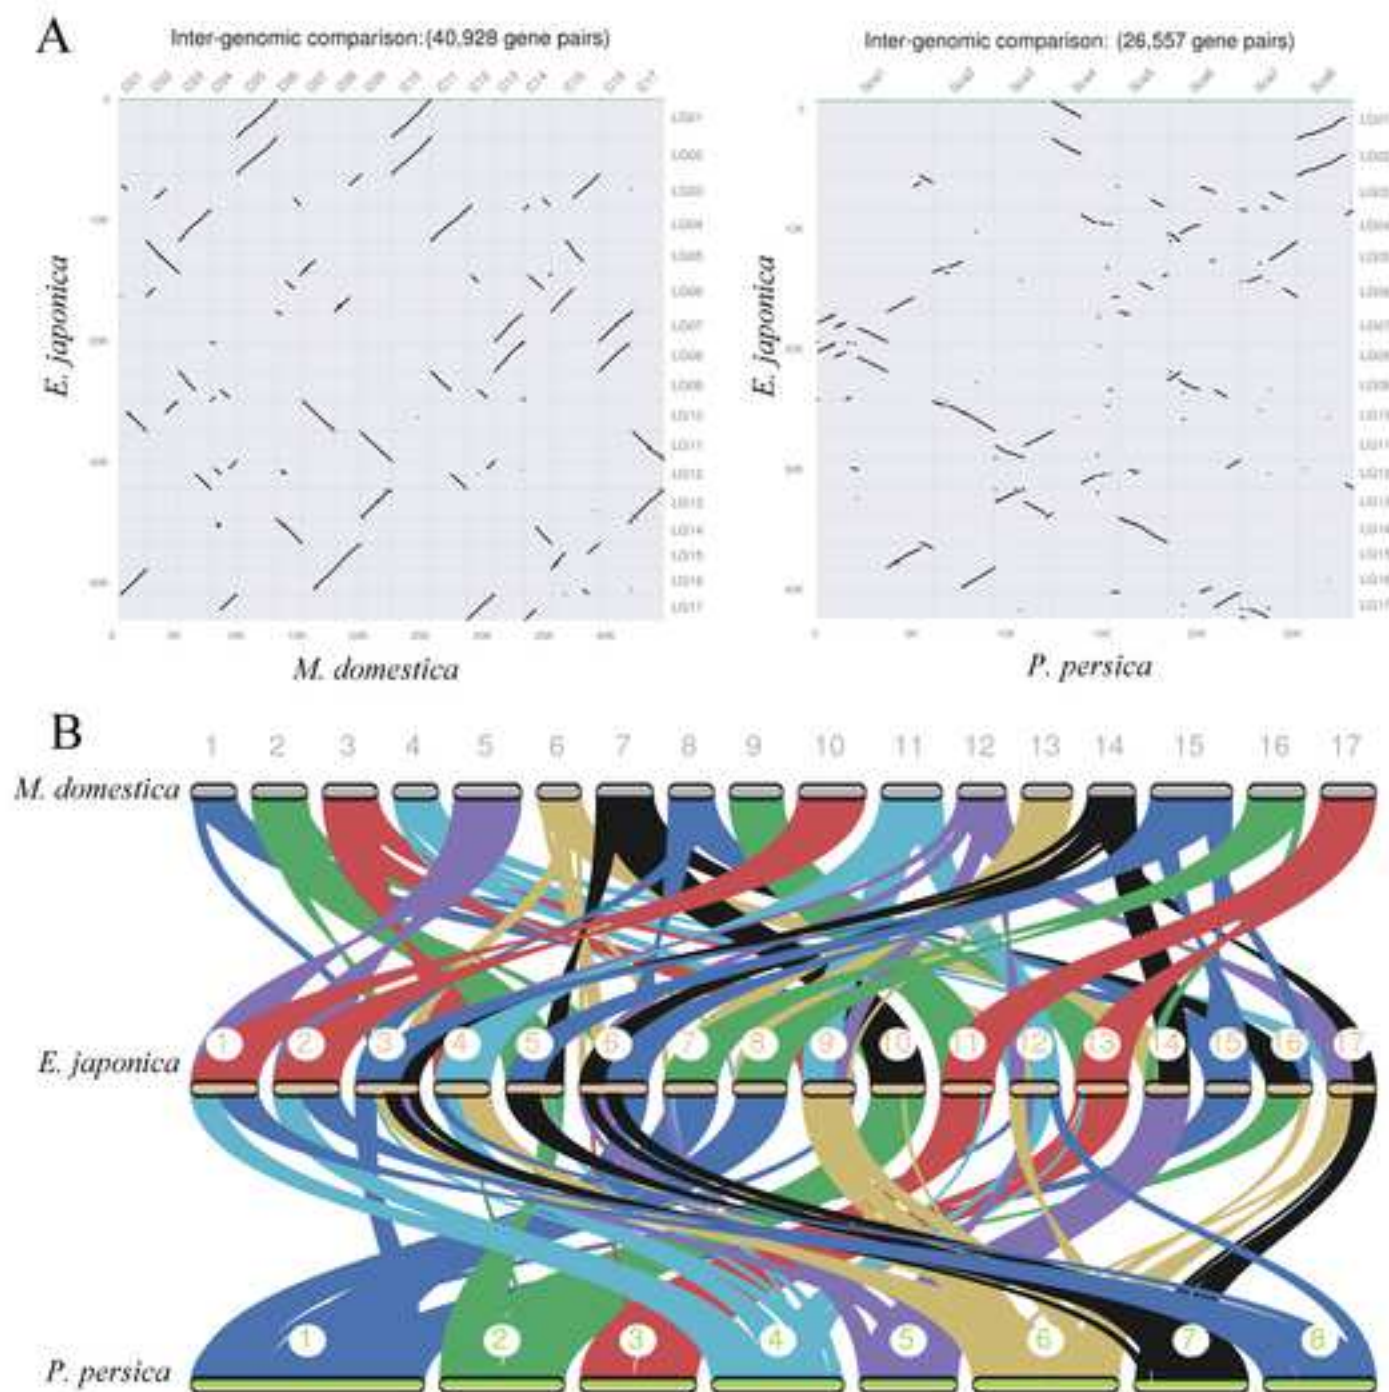



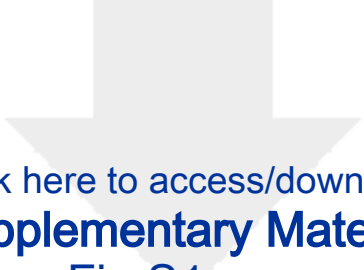

Click here to access/download  
**Supplementary Material**  
Fig S1.png



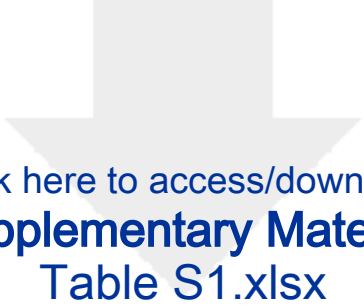

Click here to access/download  
**Supplementary Material**  
Table S1.xlsx



Click here to access/download  
**Supplementary Material**  
Table S2.xlsx



Click here to access/download  
**Supplementary Material**  
Table S3.xlsx



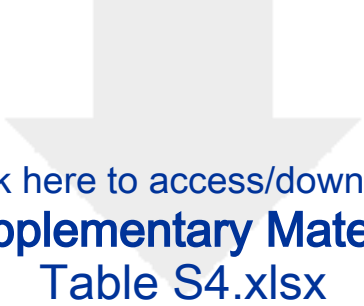

Click here to access/download  
**Supplementary Material**  
Table S4.xlsx



Click here to access/download  
**Supplementary Material**  
Table S5.xlsx
